# Supplementary material
Source: PubMed Central journal article supplement (PMC2820583)
Supplement: NIHMS92740-supplement-01.pdf [file NIHMS92740-supplement-01.pdf]

## Supplemental Data

### Establishing New Sites of Polarization by Microtubules

Nicolas Minc, Scott V. Bratman, Roshni Basu, and Fred Chang

#### Supplemental Discussion:

##### **a- Bending ratio and MT catastrophe location in bent cells**

A simple model based upon geometrical considerations can predict sites of MT contact in a given bent cell. In this description, we define the *bending ratio*,  $\gamma = \ell / L$ , where  $L$  is the cell length and  $\ell$  is twice the distance from the center of the nucleus to the cell cortex along the axis perpendicular to the short axis of the cell (Figure 2C and S2A). This dimensionless parameter represents the change in the distance between the nucleus and the cortex upon cell bending. The bending ratio is 1 in a straight cell, and decreases as a cell becomes more bent (Figure S2B). Given that a MT grows straight from the nucleus to the cortex along the axis perpendicular to the short axis of the cell, we can predict that the MT contacts the cortex at an absolute position of  $S_{\text{contact}} \approx 1 - \gamma$  away from the tip. This value increases as the cell is more bent, indicating that MTs contact the cortex closer to the nucleus as cells become more bent (Figure 2C). In our experimental data, the average location of catastrophes that occurred on the cell side followed a similar trend ( $S_{\text{cat}} = 0.72 - 0.60\gamma$ , Figure 2E). This correlation suggested that contact with the cortex imposed by the bent shape had a critical effect on inducing catastrophe. This trend was independent of cell length, suggesting that global reorganization of MTs upon cell bending was not the result of a length scale inherited from the previous straight cell conformation. Instead, MT reorganization following cell bending, appears to be a consequence of the catastrophes occurring on the cell side. Further, because the cell side is closer to the nucleus in the bent cell (by a factor  $\gamma$ ), MTs are notably shorter on average than they are in a straight cell of same length.

##### **b-Hot spots analysis of catastrophe**

To test whether hot spots distributions were significantly different from a random distribution, we compared these experimental data with a large set of Monte Carlo simulations. For each cell we measured the length  $L_c$  corresponding to the cortex stretch where the  $n$  catastrophes occurred (in a typical bent cell, this excludes most of the zone around the nucleus and part of the tips) and the spatial resolution,  $r$ , at which we could detect a catastrophe event. These define a number of sites  $N = \lfloor L_c/r \rfloor$ , where catastrophes could possibly occur. The Monte-Carlo trials generated 1000 random distributions of the  $n$  catastrophes in these  $N$  sites and returned a vector  $[k_1 k_2 k_3 \dots]$ , where  $k_i$  is the number of clusters of  $i$  catastrophes ( $n = \sum ik_i$ ). The multinomial probability associated with the Monte-Carlo vector and with the experimental data were computed as :

$P_{multi} = \frac{n!}{N^n \prod ((i)!)^{k_i}}$ . The probability,  $p$ , of obtaining the experimental distribution as

compared to a randomized trial is thus obtained by:  $p = \frac{P_{multi}(Experimental)}{P_{multi}(Montecarlo)}$ . This

analysis showed that these experimental distributions are significantly different from those arising by chance. Typically, the probability of a given distribution of hot spots was 100-10000 times smaller than a distribution arising from a random clustering of events generated by the simulation (see values of  $p$  in bar plots of Figure 2E and S4A). The value of  $p$  allows to undoubtedly discern a non-random from a random distribution when smaller than 0.01.

### **c- Relationships between cortex curvature and sites of MT catastrophe and bud6p recruitment.**

Sites of MT catastrophe in bent cells were not obviously due to cell surface perturbations from the bending. Catastrophe sites did not correspond to areas of maximum curvature; many sites were located at relatively “unbent” parts of the cell (Figure 2E). The location of catastrophe on the cell side was independent of cell curvature (Figure S6A).

Importantly, in a subset of cells that popped out of the well into their original straight conformation, MTs rearranged almost immediately along the long axis of the cell, illustrating the rapid response of the MT cytoskeleton organization to a given cell shape

(Figure S5A and Movie 4). Further, preliminary results suggest that similar hot spot distributions can also be found at the tips of normal non-bent cells (our unpublished data). The regions of bud6p accumulation also did not correlate with sites of maximal curvature, and sometimes occurred in cortical regions that were not curved (Figure 3B, 4A). The location of bud6-3GFP on the cell side was independent of cell curvature (Figure S6B). Further, in cells that were bent only transiently (for about 1-2 minutes), but then popped out of the well and straightened back into a rod shape, no bud6p redistribution was apparent (Figure S5B).

## SUPPLEMENTARY FIGURE LEGENDS

### Figure S1. PDMS array of microchambers with varying sizes.

The picture at the center represents the PDMS replica onto which cells are placed. This replica encompasses 8 regions, each composed of 2500 cylindrical microchambers with varying diameters (from 10 to 50 $\mu\text{m}$ ). The three other pictures depict examples of these different regions (black=10 $\mu\text{m}$ , red=25 $\mu\text{m}$ , blue=50 $\mu\text{m}$  holes) covered with yeast cells. Scale bar: 20 $\mu\text{m}$ .

### Figure S2. Growth rates of bent cells and methods for generating different bent cells.

(A) Schematic representing the important geometrical parameters for computing the bending ratio of a cell in a round chamber.  $L_0$  is the diameter of the well,  $L$  the cell length, and  $d$  the cell diameter.  $R$  is the radius of curvature of the bent cell and  $\ell$  is twice the distance from the center of the nucleus to the side of the cell following the axis perpendicular to the short axis of the cell. The bending ratio,  $\gamma = \ell / L$ , thus describes how close the cortex is from the nucleus along the former axis of the cell. For a straight cell

$\gamma = 1$  and for a bent cell :  $\gamma = \frac{1}{L} \sqrt{4Rd - d^2}$ . The radius of curvature  $R$  of a given cell

bent in a given hole can be computed and follows:  $L_0 = 2R \sin(\frac{L}{2R})$  for  $L \leq \frac{\pi L_0}{2}$  and

$R = \frac{L_0}{2}$  for  $L \geq \frac{\pi L_0}{2}$ . These equations can be computationally inverted to finally compute

and plot  $\gamma$  as a function of  $L$  for different values of  $L_0$  as depicted in C. (B) Pictures of wild-type cells of varying length, bent in holes of different sizes. Values in yellow correspond to the bending ratio,  $\gamma$ , and in white to the cell length,  $L$ . Strain: FC504. (C)

Mathematical representation of the bending ratio,  $\gamma$ , as a function of cell length for different well sizes. In these plots, the superimposed dots correspond to the cells

depicted in B. Scale bars: 10 $\mu\text{m}$ . (D) Time lapse of a cell initially bent which grows and goes through an entire cell cycle in a microchamber. Values of actual elongation rates measured for straight and bent cells growing inside microchambers ( $n=10$  for each condition). The error bars represent the standard deviation. Strain: FC504 (*cdc25-22* at 25°C). Scale bar: 5 $\mu\text{m}$

**Figure S3. Interphase MT behavior in bent cells.**

(A) Time-lapse imaging of a cell expressing GFP-tubulin bent in a 25 $\mu$ m chamber. MT bundles track the outer curvature of the cell, often bending significantly without breaking. One example is marked by purple arrowheads. This MT grows in constant contact with the cortex until it undergoes catastrophe (yellow arrowheads) and shrinks away (white arrowhead). Images are maximum projections of confocal stacks. Time is in min:sec. Strain: NM11 (*cdc25-22* at 25°C). (B) Quantification of interphase MT plus end behavior in the cytoplasm. Cells expressing GFP-tubulin were placed into microchambers, and rates of plus end growth and shrinkage were determined from time-lapse maximum projection confocal images (n=20 for each parameter). Growing MTs were examined prior to coming in contact with cortex. There were no statistically significant differences in these measurements, indicating that bending of the cells does not noticeably perturb MT plus end dynamics within the cytoplasm. (Bottom) Same measurement for straight cells with different lengths. The error bars represent the standard deviation. Strain: NM11. (C) Plus end growth rate at the cell cortex as a function of the average angle of MT-cortical contact. Growth rates were determined for the entire MT prior to buckling or catastrophe using single focal plane time-lapse imaging and fluorescent speckle analysis. Error bars represent experimental uncertainties. Strain NM11.

**Figure S4. Hot spots distributions and significance at the side of bent cells.**

(A) Schematic of MT catastrophe events in bent cells. MT catastrophes were determined from time-lapse images of GFP-tubulin. Specific points on the cortex that experience multiple catastrophe events are indicated (orange and red dots) and further represented in the corresponding bar plot on the right. Dots size and bar width encompass the error made in the measurement. Numbers on the top right of each bar plot represents the probability of having this particular distribution as compared to a random trial. Strain: NM11 (*cdc25-22* at 25°C). Scale bars: 5 $\mu$ m. (B) Hot spots do not arise only by chance. Histogram representing the clustering of catastrophe events in the three cells presented in (A) and in corresponding Monte-Carlo trials (see supplementary text). (C) Time-lapse images corresponding to the second cell in A illustrating the presence of a hot spot

(indicated by the arrow). The number at the bottom counts the number of catastrophes occurring at this site. Strain NM11. Scale bar: 5 $\mu$ m.

**Figure S5. Response of MTs and bud6p to transient cell bending.**

Cells expressing GFP-tubulin (A) or bud6-3GFP (B) were imaged before and after being pushed into microchambers. Cells buckled into the chambers by over-focusing with the objective (for ~2 minutes). When the objective was refocused, the cells quickly straightened and popped out of the chambers. This transient cell bending did not change the distribution of MTs or bud6p in straight cells. Maximum projection confocal images are shown. Strains: NM11 and NM01 (*cdc25-22* at 25°C). Scale bars: 5 $\mu$ m.

**Figure S6. Role of curvature in MT catastrophe/ bud6p redistribution.**

(A) The average absolute position of catastrophe events on the cell side is independent of the radius of curvature (Correlation coefficient: 0.21). (D) The absolute position of bud6p on the cell side is independent of the radius of curvature (Correlation coefficient: -0.15).

**Figure S7 Ectopic recruitment of tea1p in bent cells.**

(A) Tea1-3GFP localization in straight and bent cells. Strain: RB03 (*cdc25-22* at 25°C). (B) Tea1p localizes predominantly at MT plus ends in contact with the cell sides. Strain: NM39. Scale bars: 5 $\mu$ m.

**Figure S8. Distribution of for3p in *tea1* $\Delta$ , *moe1* $\Delta$  and *mal3* $\Delta$  bent cells .**

(A) For3-3GFP localization in straight and bent *tea1* $\Delta$ , *moe1* $\Delta$  and *mal3* $\Delta$  cells in the presence and the absence of LatA. (B) Proportion of bent cells that show a specific localization of for3-3GFP to the cell side in the indicated genetic backgrounds and conditions (n $\approx$ 30 for each condition). Strains: NM09, NM07, NM70 + HU and RB112 + HU. Scale bar: 5 $\mu$ m.

**Figure S9. Distribution of bud6p in bent cells.**

Bud6-3GFP position in a normal and bent cell of the indicated mutants. Strains: NM32, NM49 + HU, NM44 + HU, NM50 + HU, NM47 + HU, NM45 + HU, NM46 + HU. Scale bars: 5 $\mu$ m. \* For this experiment, the temperature of the objective was raised to 30°C with a Bioptechs objective heater.

**Figure S10. Interphase MT behavior in *mal3* $\Delta$  and *moe1* $\Delta$  straight and bent cells.**

(A) Catastrophe mapping in bent *mal3* $\Delta$  and *moe1* $\Delta$  cells and the corresponding merged image over 10 minutes. Strains: SB408 + HU, RB65 + HU. (B) Quantification of interphase MT plus end behavior in the cytoplasm of *mal3* $\Delta$  and *moe1* $\Delta$  cells. Cells expressing GFP-tubulin were placed into microchambers, and rates of plus end growth and shrinkage were determined from time-lapse maximum projection confocal images (n is indicated for each parameter).

**Figure S11. A new pathway involving *mal3p*, *moe1p* and *for3p* responsible for linking polarity by MTs is parallel to the *tea1p*-*tea4p* pathway.**

(A) Co-immunoprecipitation of endogenously expressed *moe1*-GFP and *for3*-myc from yeast extracts. To prepare yeast extracts, cells were grown in minimal media, harvested, washed and resuspended in an equal volume of CXS buffer (50mM HEPES, pH 7.5, 20 mM KCl, 1mM MgCl<sub>2</sub>, 2mM EDTA, and protease inhibitor cocktail). The slurry was frozen as pellets in liquid nitrogen and ground into a powder. 3 ml of the resulting powder was thawed and protease inhibitors were added. The slurry was centrifuged at 13.2krpm for 10 mins at 4°C. 0.1% Triton X-100 was added to the supernatant and was centrifuged at 45krpm for 30 min at 4°C to obtain the soluble yeast extract. For immunoprecipitation, Dynal sheep anti-mouse beads were washed twice in PBS, and preincubated for 2 hours with 0.8 $\mu$ g monoclonal anti-GFP antibody (Roche) and 1mg/mL BSA (Sigma). The beads were then washed and incubated with 100 $\mu$ L of soluble yeast extract for 2 hours at 4°C. After incubation, beads were washed extensively, boiled in 50 $\mu$ L of 1X sample buffer and loaded onto 6% SDS-PAGE gels. For immunoblotting monoclonal anti-GFP antibody (Roche) and polyclonal anti-myc antibody A-14 (Santa Cruz Biotechnology) were used. Co-immunoprecipitation was observed in three independent experiments. (B) Polarity and cell shape of wildtype, *mal3* $\Delta$ , *moe1* $\Delta$ , *tea1* $\Delta$ ,

*tea1Δ mal3Δ* and *tea1Δ moe1Δ* in the indicated conditions. Error bars represent standard variations arising from different experiments. Number of cells for each point,  $n \approx 100$ .  
Strains: FC420, FC1440, RB75, NM68 and NM72.



**Table S1. *S. pombe* strains used in this study.**

|        |                                                                                |
|--------|--------------------------------------------------------------------------------|
| NM01   | cdc25-22 bud6-3GFP:kanMX                                                       |
| NM07   | cdc25-22 for3-3GFP:ura4+                                                       |
| NM09   | cdc25-22 tea1Δ::ura4+ for3-3GFP:ura4+                                          |
| NM11   | cdc25-22 sv40:GFP-atb2 [leu1+]                                                 |
| NM14   | cdc25-22 tea1Δ::ura4+ bud6-3GFP:kanMX                                          |
| NM15   | cdc25-22 leu1-::GFP-bgs4:leu1+                                                 |
| NM19   | cdc25-22 bud6-3GFP:kanMX pSB62[ <i>pnmt41::mRFP-atb2</i> ; LEU2]               |
| NM20   | cdc25-22 tea1Δ::ura4+ sv40:GFP-atb2 [leu1+]                                    |
| NM24   | bud6-3GFP pSB62 [ <i>pnmt41::mRFP-atb2</i> ; LEU2]                             |
| NM30   | cdc25-22 tip1Δ::kanMX bud6-3GFP:kanMX                                          |
| NM32   | cdc25-22 mod5Δ::kanMX bud6-3GFP:kanMX                                          |
| NM33   | cdc25-22 leu1-::nmt41:GFP-CHD <sup>mg2</sup> :leu1+                            |
| NM34   | cdc25-22 bud6-GFP:kanMX tea4Δ::kanMX                                           |
| NM39   | cdc25-22 tea1-3GFP:kanMX pSB62[ <i>pnmt41::mRFP-atb2</i> ; LEU2]               |
| NM42   | cdc25-22 bud6-tomato:natMX sv40:GFP-atb2 [leu1+]                               |
| NM43   | cdc25-22 tea3Δ::kanMX                                                          |
| NM44   | bud6-3GFP:kanMX tea3Δ::kanMX                                                   |
| NM45   | bud6-3GFP:kanMX mto1Δ::natMX                                                   |
| NM46   | bud6-3GFP:kanMX cls1-36:ura4+                                                  |
| NM47   | bud6-3GFP:kanMX tea2Δ::his3+                                                   |
| NM48   | cdc25-22 bud6-3GFP:kanMX mal3Δ::his3+                                          |
| NM49   | bud6-3GFP:kanMX pom1Δ::ura4+                                                   |
| NM50   | bud6-3GFP:kanMX tea1Δ::ura4+ tea3Δ::kanMX                                      |
| NM59   | cdc25-22 cdc42-A6-GFP:kanMX                                                    |
| NM68   | moe1Δ::ura4+ tea1Δ::ura4+                                                      |
| NM70   | mal3Δ::his3 for3-3GFP:kanMX                                                    |
| NM72   | mal3Δ::his3+ tea1Δ::natMX                                                      |
| NM117  | cdc25-22 bud6-3GFP:kanMX moe1Δ::ura4+                                          |
| NM115  | cdc25-22 bud6-3GFP:kanMX for3Δ::kanMX                                          |
| NM145  | cdc25-22 CRIG-GFP:ura4+                                                        |
| NM151  | cdc25-22 moe1Δ::ura4+ tea1Δ::ura4+ bud6-3GFP:kanMX                             |
| SB408  | mal3Δ::his3+ sv40:GFP-atb2 [leu1+]                                             |
| RB03   | cdc25-22 tea1-3GFP:kanMX                                                       |
| RB65   | moe1Δ::ura4+ sv40:GFP-atb2 [leu1+]                                             |
| RB75   | moe1Δ::ura4+                                                                   |
| RB112  | moe1Δ::ura4+ for3-3GPF:kanMX                                                   |
| RB273  | moe1-GFP:kanMX for3-myc:kanMX                                                  |
| FC420  | WT                                                                             |
| FC504  | cdc25-22                                                                       |
| FC691  | tea1Δ::ura4+                                                                   |
| FC1440 | mal3Δ::his3+                                                                   |
| FC1451 | cdc25-22 cut11-GFP:ura4+ rlc1-GFP:kanMX pDQ105[ <i>pnmt1::GFP-atb2</i> ; LEU2] |

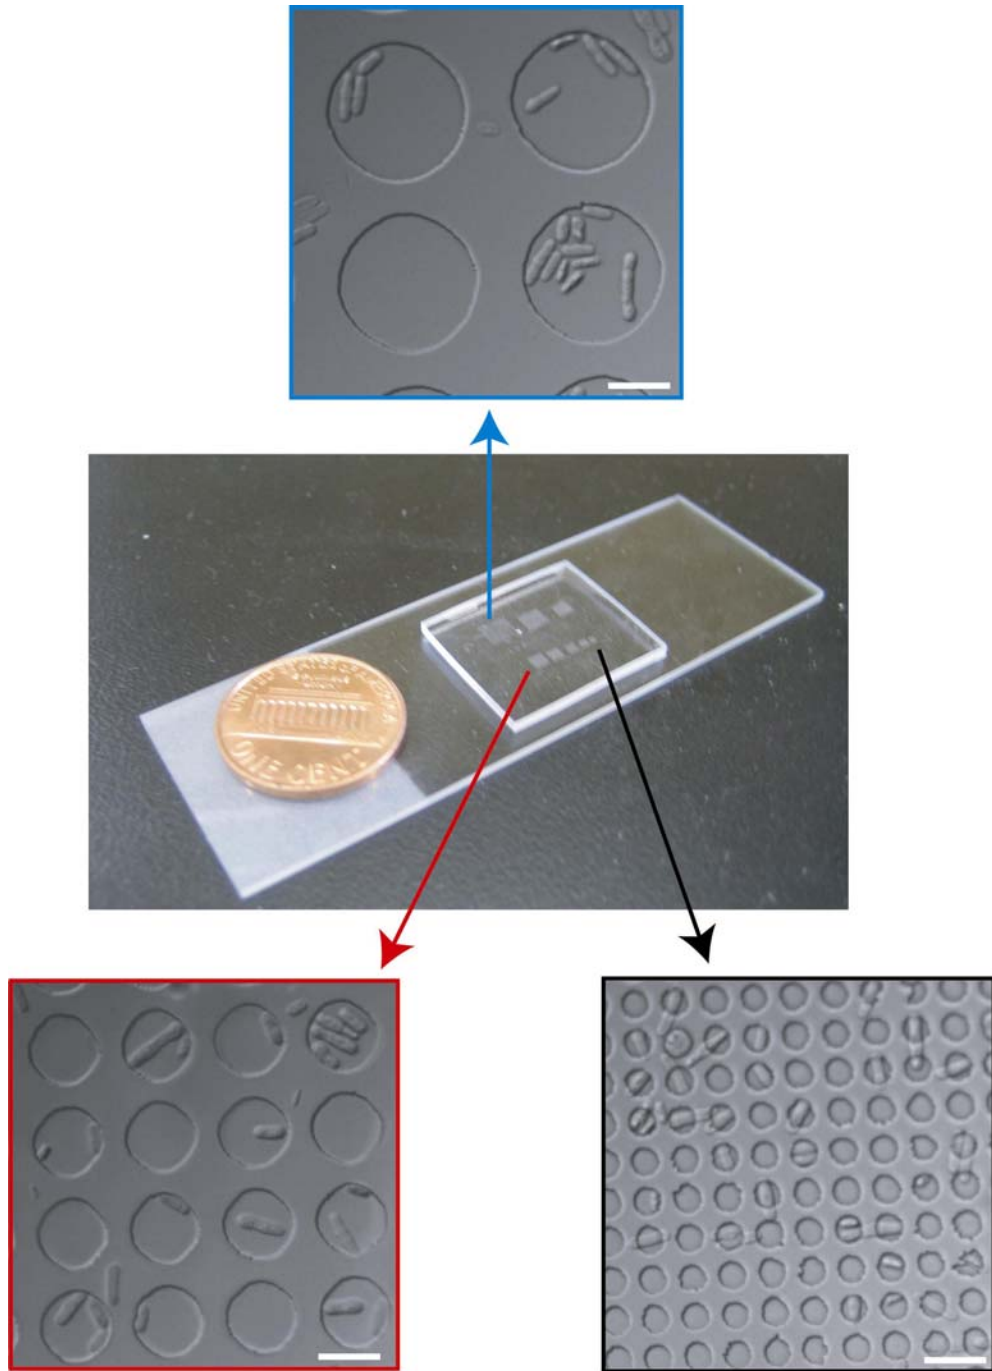

Figure S1

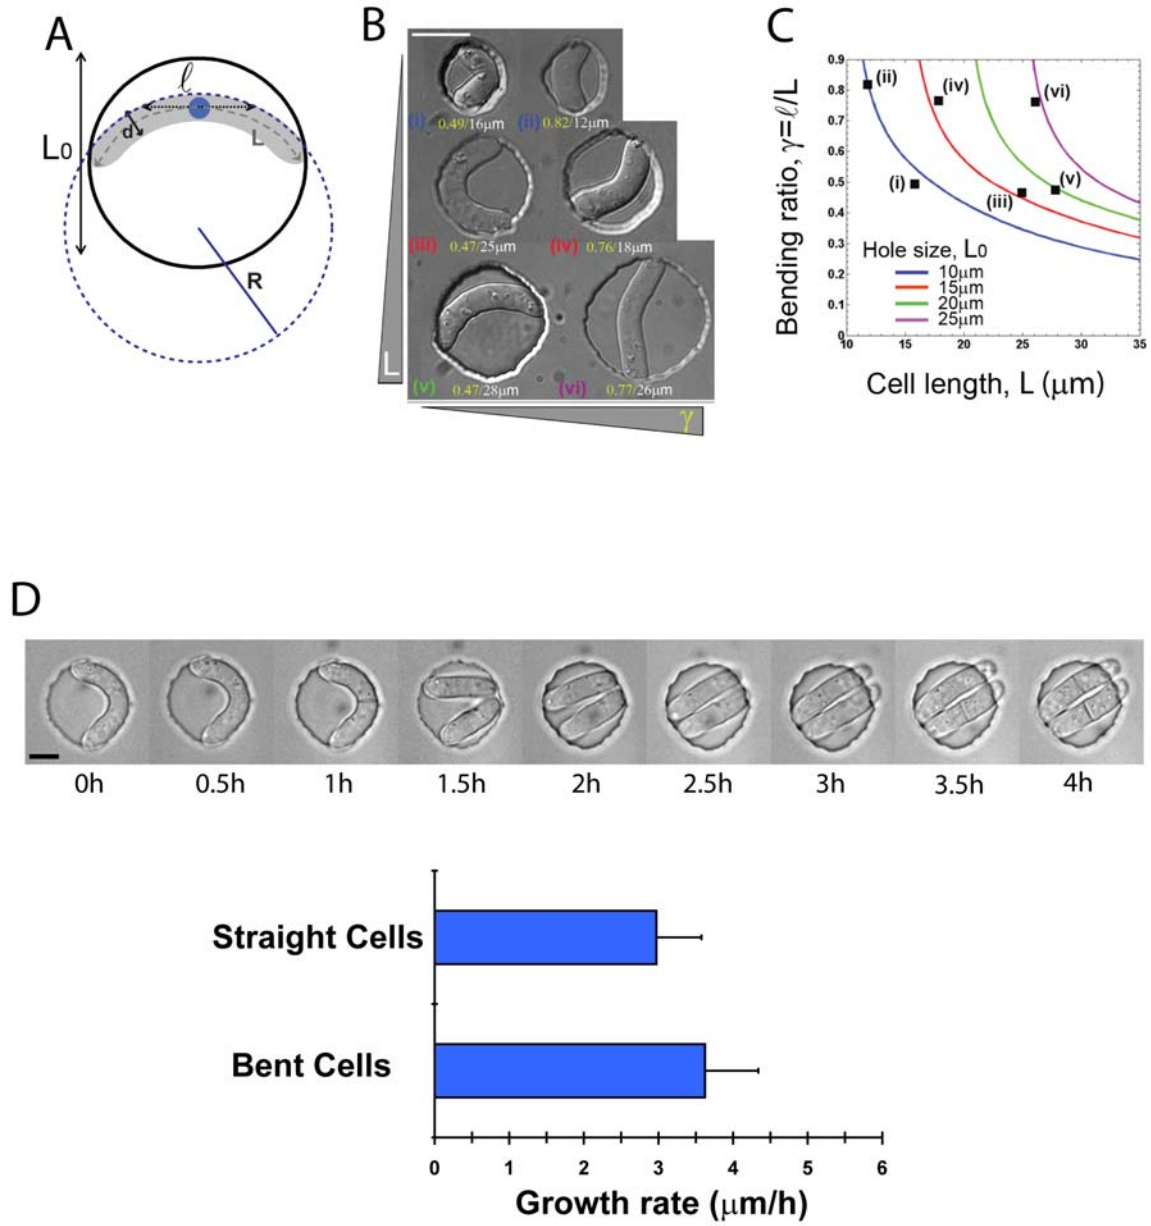

Figure S2

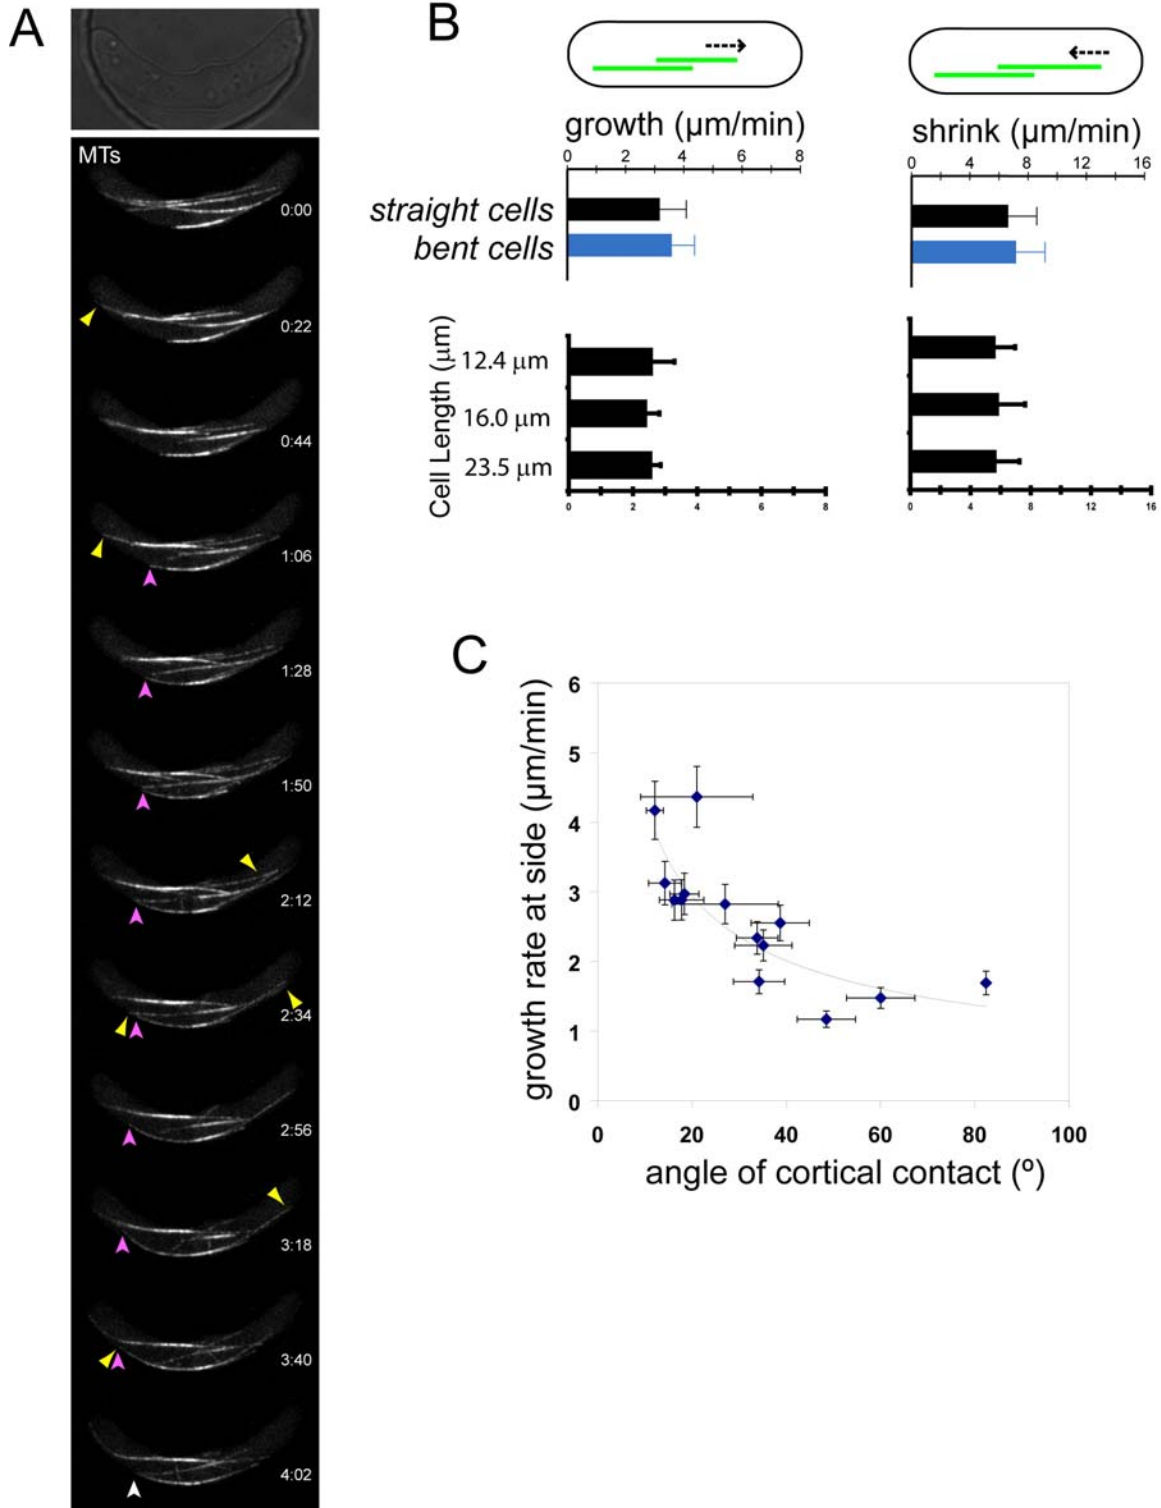

Figure S3

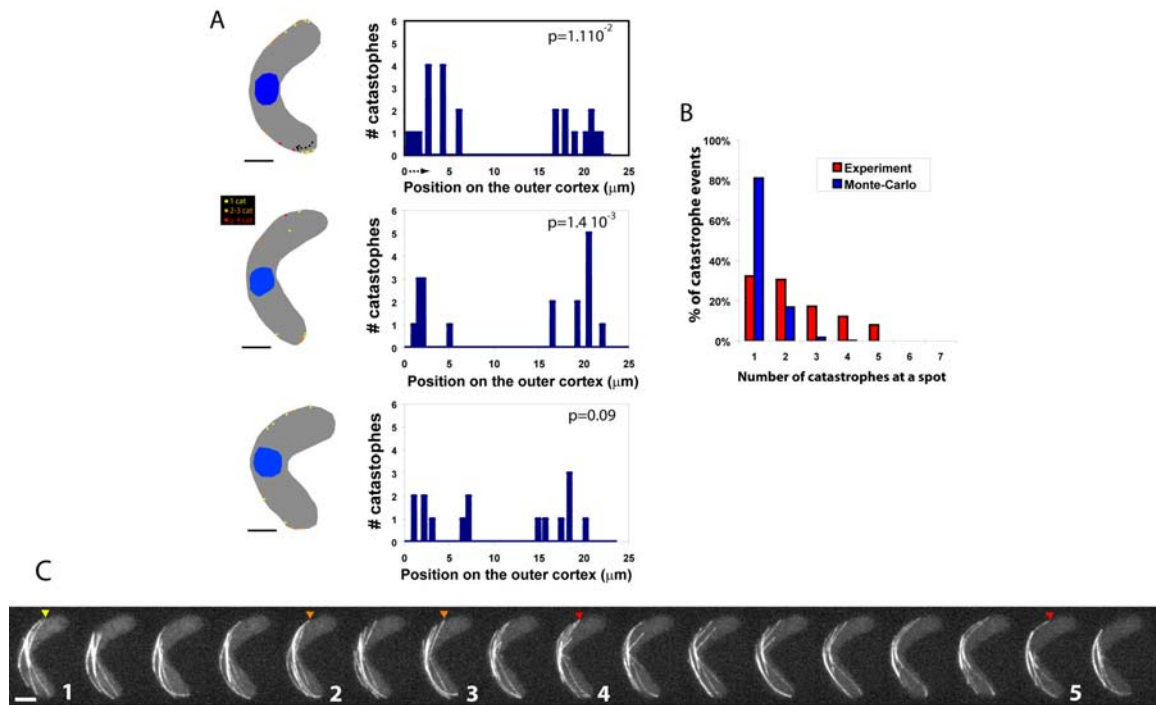

Figure S4

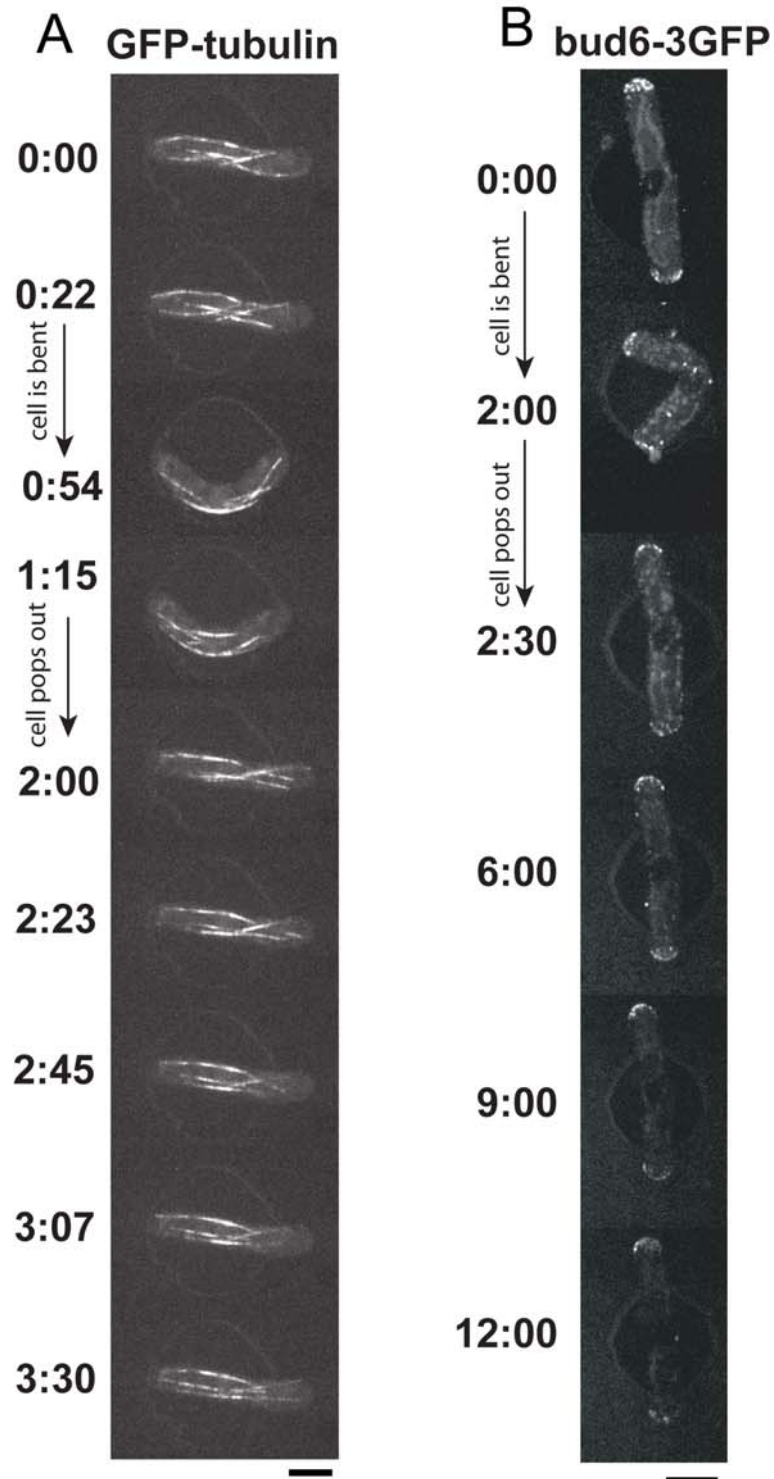

Figure S5

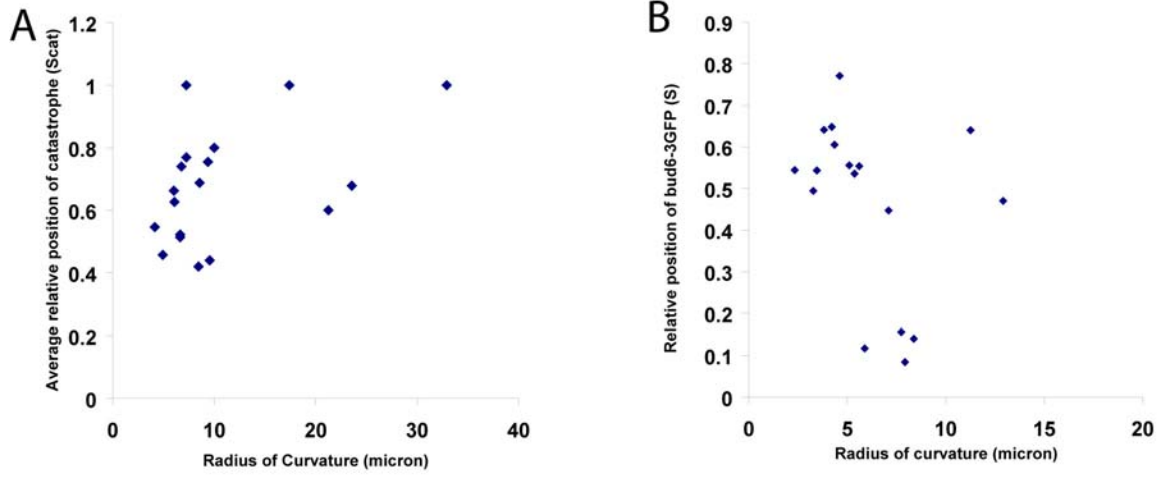

Figure S6

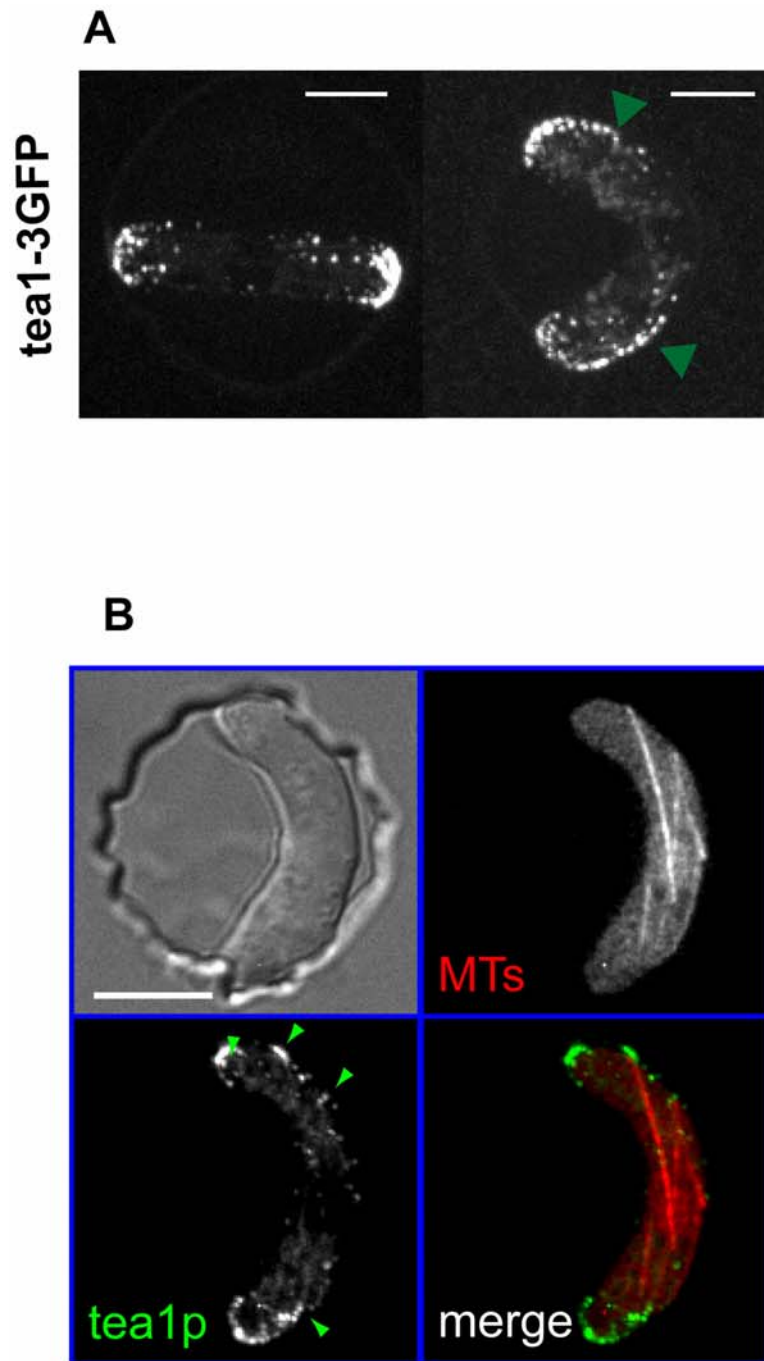

Figure S7



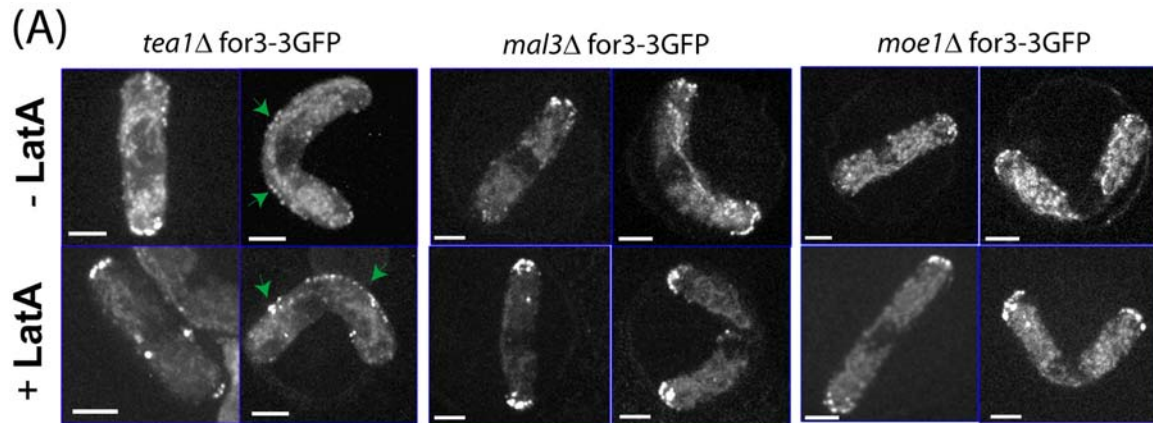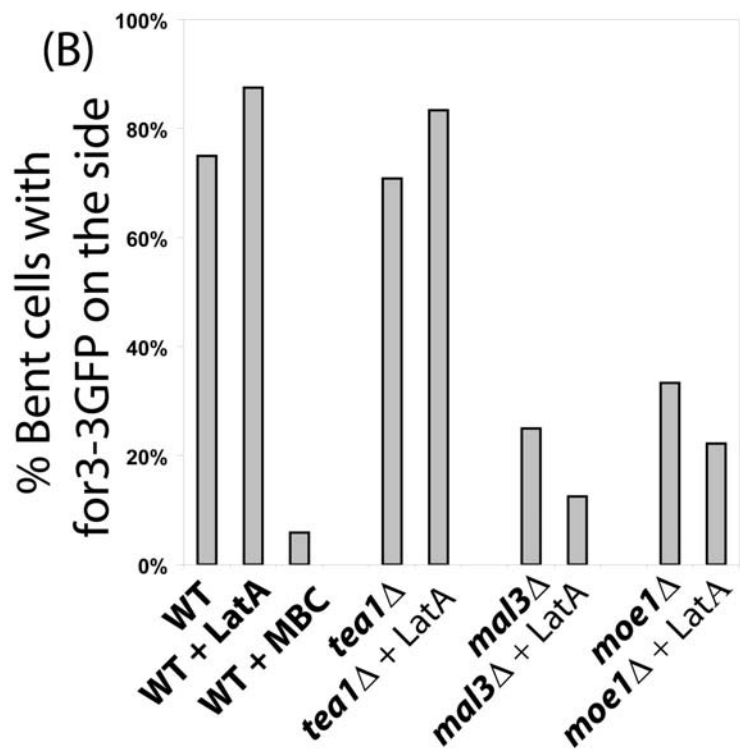

Figure S8

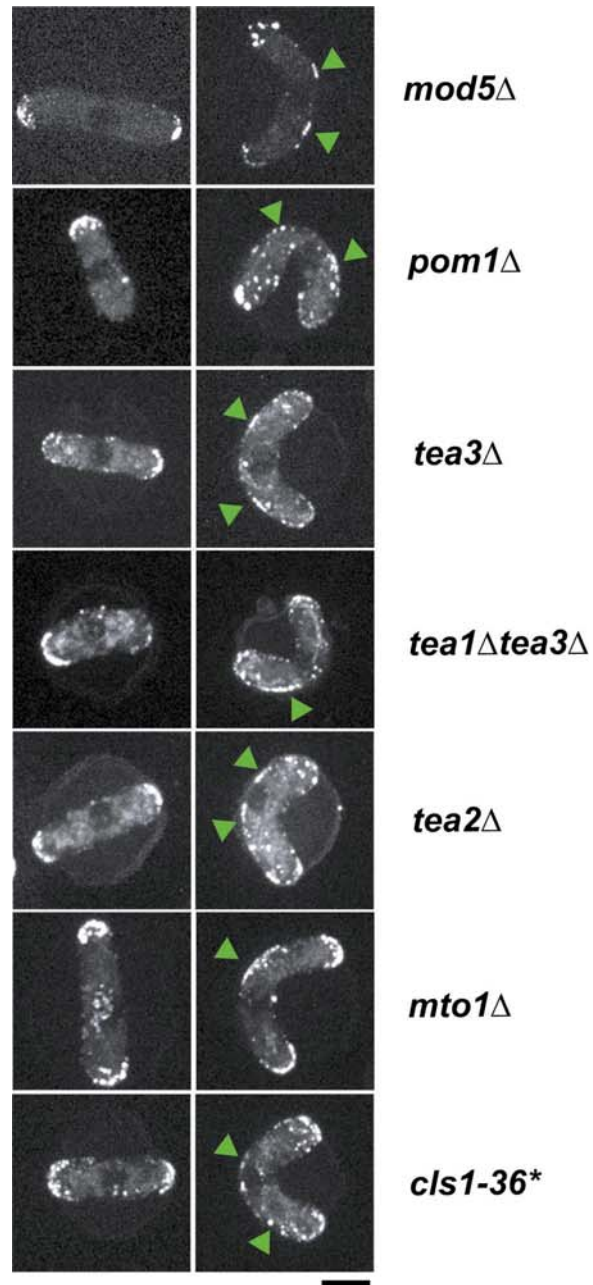

**Figure S9**

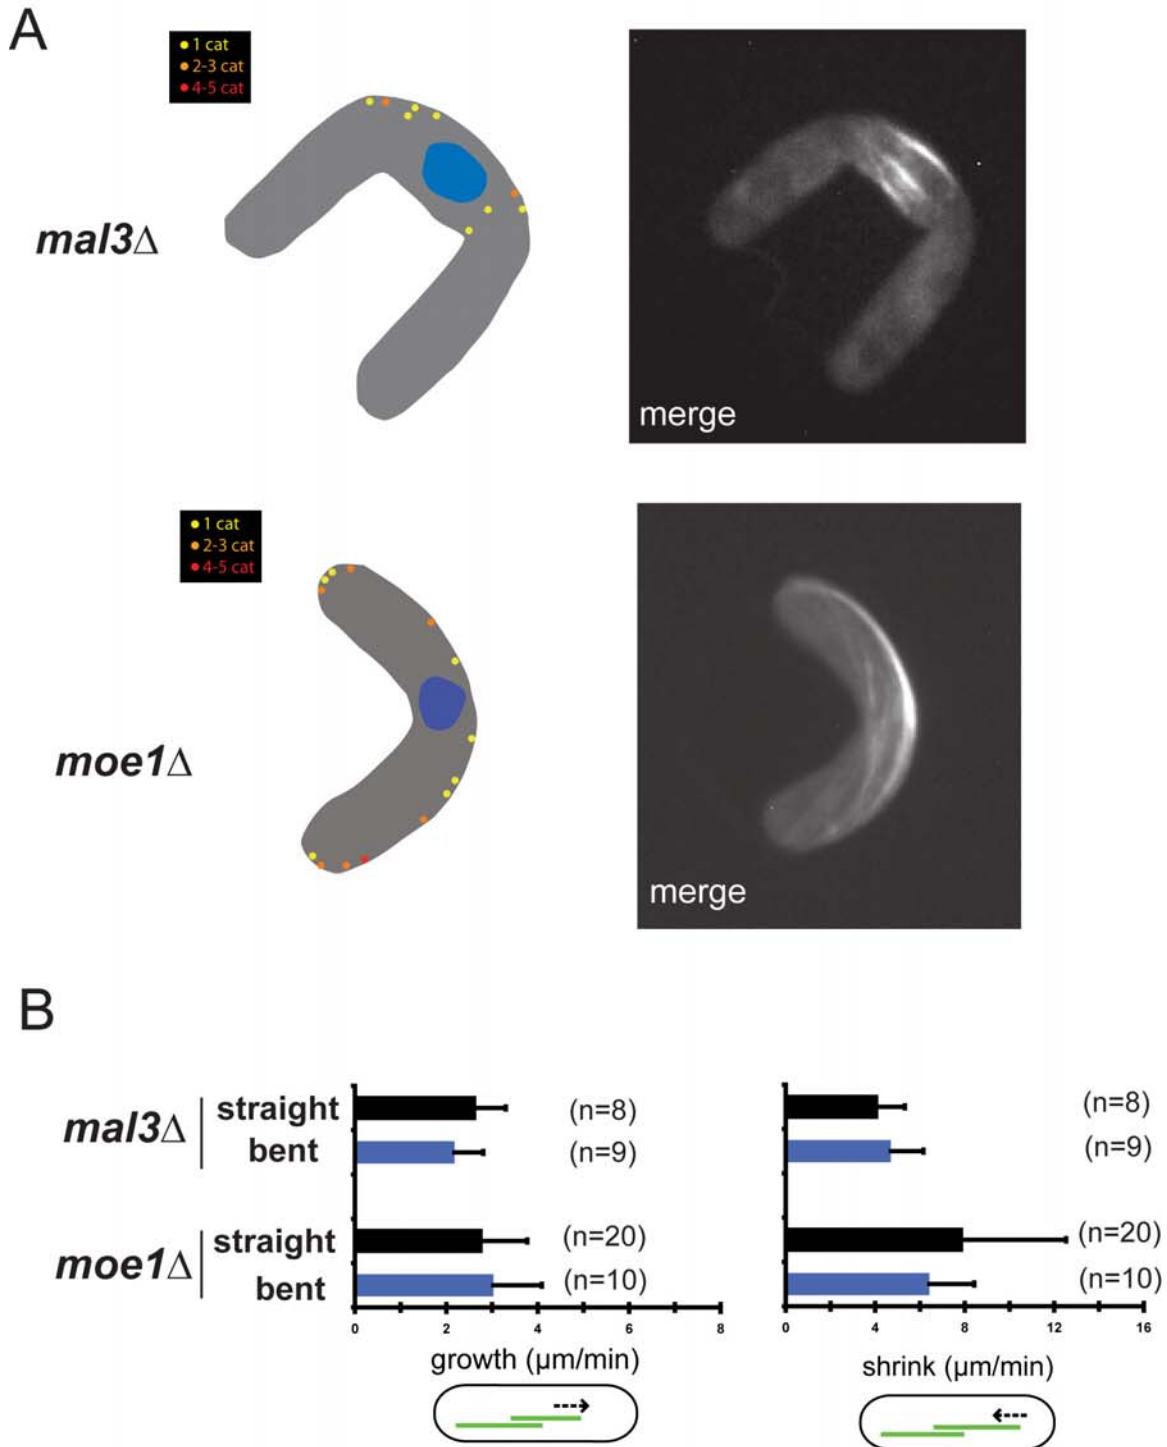

Figure S10

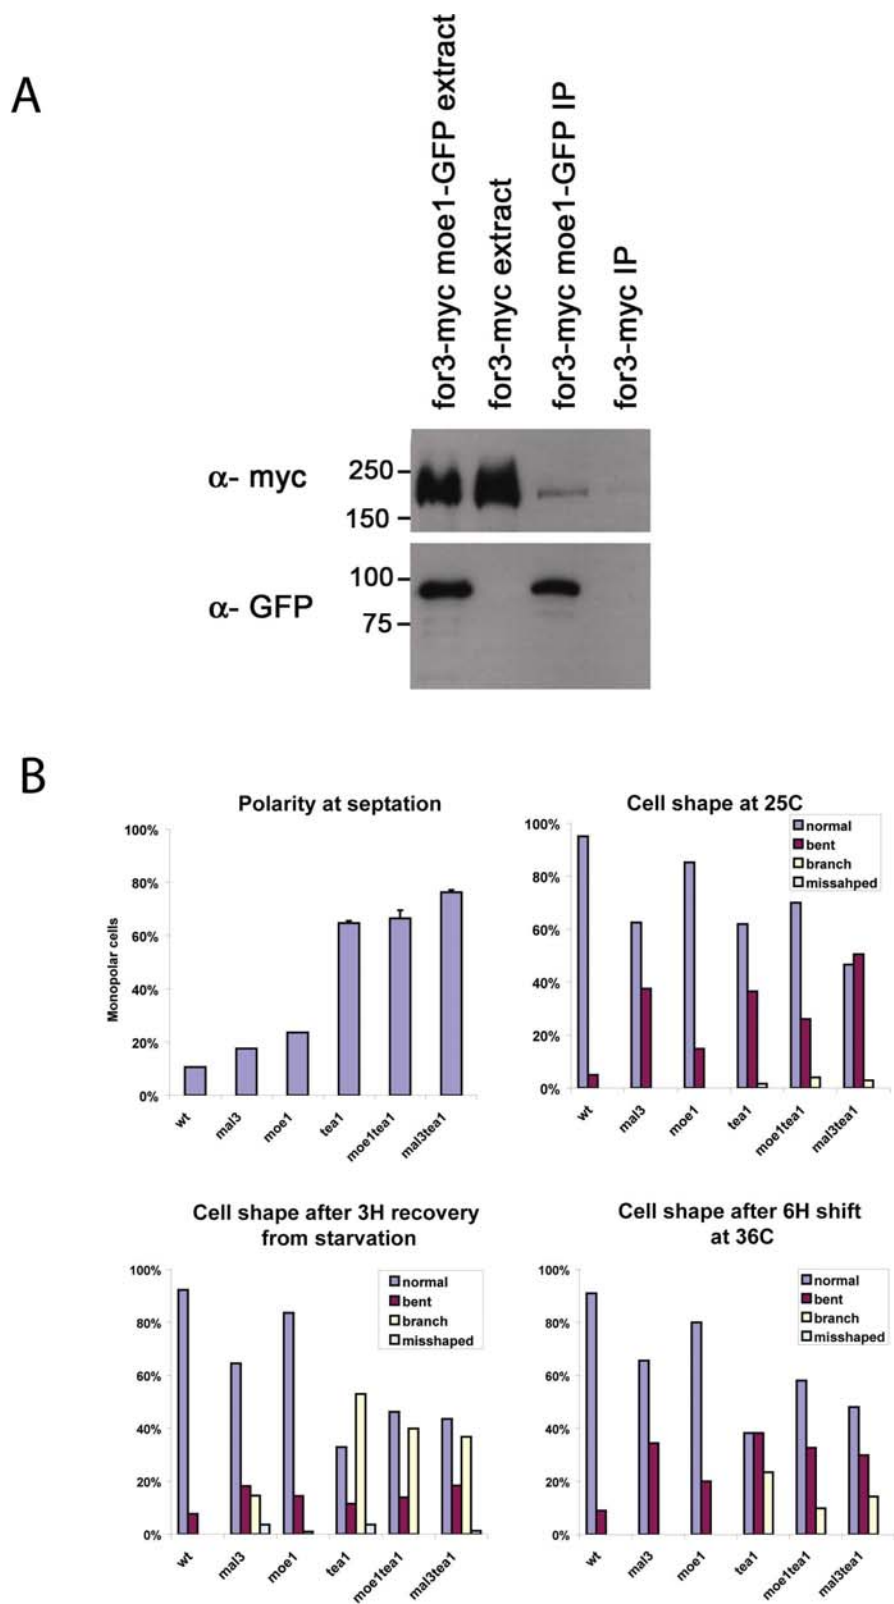

**Figure S11**
